# Supplementary material for: Characterization of multi-drug tolerant persister cells in Streptococcus suis
Source: PubMed Central journal article supplement (PMC4040513; doi:10.1186/1471-2180-14-120), 2014-05-12
Supplement: 1471-2180-14-120-S1.pdf [file 1471-2180-14-120-S1.pdf]

**Additional file 1:Table S1.** MIC values of antimicrobial compounds ( $\mu\text{g/ml}$ ) for different streptococcal strains. ND stands for 'not determined'.

| <b>Bacterial strain</b>         | Gentamicin<br>(aminoglycoside) | Penicillin G<br>( $\beta$ -lactam) | Amoxicillin<br>( $\beta$ -lactam) | Ciprofloxacin<br>(fluoroquinolone) | Rifampicin<br>(rifamycin) | Daptomycin<br>(cyclic lipopeptide) |
|---------------------------------|--------------------------------|------------------------------------|-----------------------------------|------------------------------------|---------------------------|------------------------------------|
| <i>Streptococcus suis</i>       |                                |                                    |                                   |                                    |                           |                                    |
| 10                              | 25.00                          | 0.05                               | 6.25                              | 1.56                               | 3.12                      | 3.12                               |
| 10 $\Delta$ ccpA                | 25.00                          | ND                                 | ND                                | ND                                 | ND                        | ND                                 |
| 10 $\Delta$ AD                  | 25.00                          | ND                                 | ND                                | ND                                 | ND                        | ND                                 |
| A3286/94                        | 25.00                          | ND                                 | ND                                | ND                                 | ND                        | ND                                 |
| 05ZYH33                         | 50.00                          | ND                                 | ND                                | ND                                 | ND                        | ND                                 |
| <i>Streptococcus gordonii</i>   |                                |                                    |                                   |                                    |                           |                                    |
| 30                              | 3.12                           | ND                                 | ND                                | 1.56                               | ND                        | ND                                 |
| <i>Streptococcus pyogenes</i>   |                                |                                    |                                   |                                    |                           |                                    |
| A40                             | 6.25                           | ND                                 | ND                                | 1.56                               | ND                        | ND                                 |
| <i>Streptococcus agalactiae</i> |                                |                                    |                                   |                                    |                           |                                    |
| 6313                            | 25.00                          | ND                                 | ND                                | 6.25                               | ND                        | ND                                 |
