# Supplementary material for: Characterization of multi-drug tolerant persister cells in Streptococcus suis
Source: PubMed Central journal article supplement (PMC4040513; doi:10.1186/1471-2180-14-120), 2014-05-12

**A**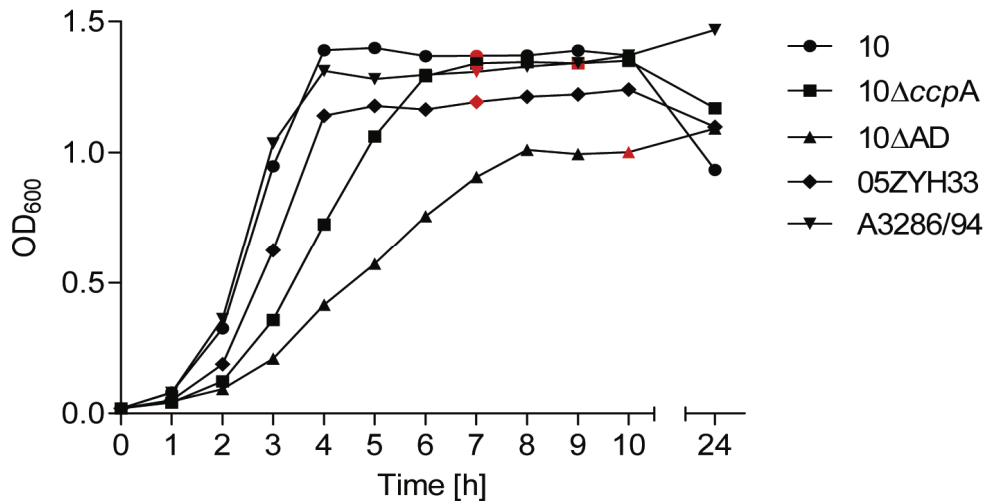**B**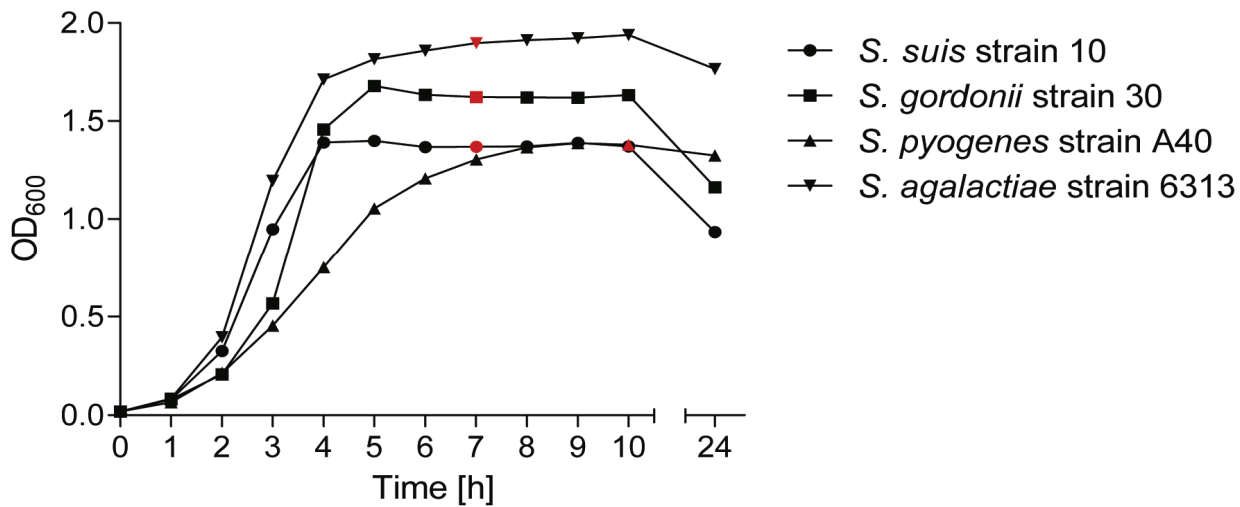

Supplement: 1471-2180-14-120-S2.pdf [file 1471-2180-14-120-S2.pdf]
